# Supplementary material for: Synthesis, optical properties, and photochemical activity of zinc-indium-sulfide nanoplates
Source: Royal Society of Chemistry journal article supplement (doi:10.1039/c5ra20570k), 2015-01-01
Supplement: c5ra20570k1.pdf [file c5ra20570k1.pdf]

## Synthesis, Optical Properties, and Photochemical Activity of Zinc-Indium-Sulfide Nanoplates

Björn Kempken,<sup>a</sup> Volodymyr Dzhagan,<sup>b,c</sup> Dietrich R. T. Zahn,<sup>b</sup> Marcelo J. P. Alcocer,<sup>d</sup> Ilka Kriegel,<sup>d,e</sup> Francesco Scotognella,<sup>d</sup> Jürgen Parisi,<sup>a</sup> Joanna Kolny-Olesiak<sup>a\*</sup>

---

<sup>a.</sup> *Energy and Semiconductor Research Laboratory, Department of Physics, Carl von Ossietzky University of Oldenburg, 26111 Oldenburg, Germany*

<sup>b.</sup> *Semiconductor Physics, Technische Universität Chemnitz, Reichenhainer Straße 70, 09107 Chemnitz, Germany*

<sup>c.</sup> *V. E. Lashkaryov Institute of Semiconductors Physics, National Academy of Sciences of Ukraine, Kyiv, 03028, Ukraine*

<sup>d.</sup> *Dipartimento di Fisica, Politecnico di Milano, Piazza Leonardo da Vinci 32, 20133 Milano, Italy.*

<sup>e.</sup> *Present address: Department of Nanochemistry, Istituto Italiano di Tecnologia (IIT), via Morego, 30, 16163 Genova, Italy*

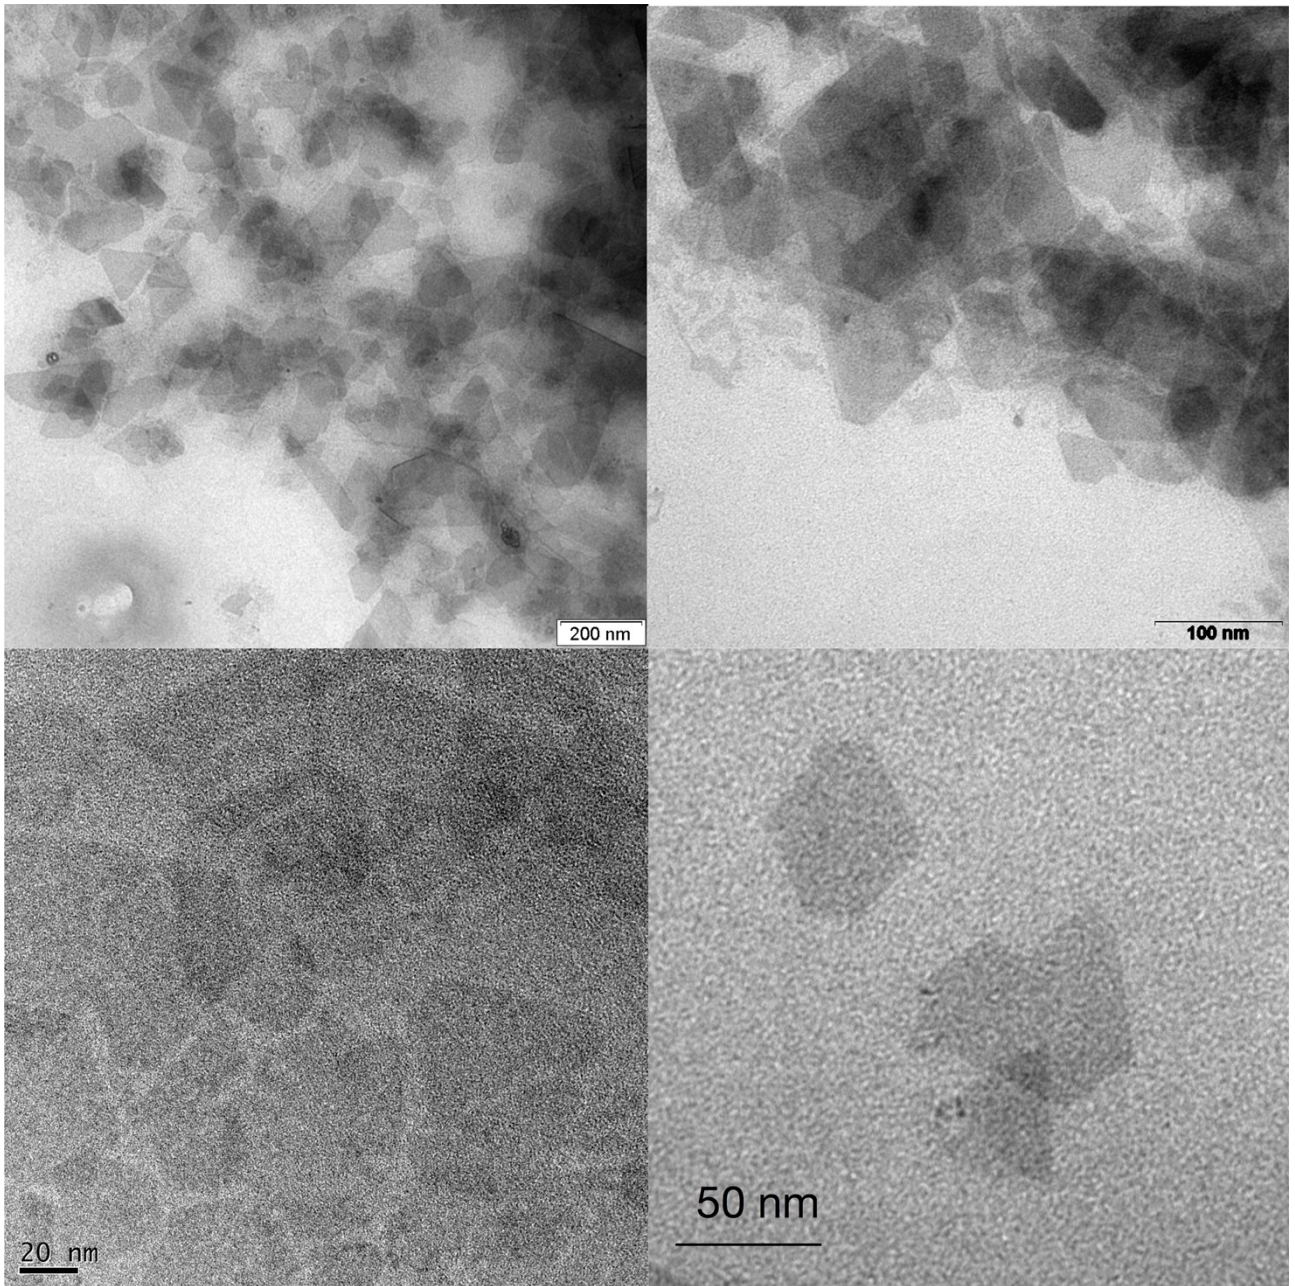

**Figure S1:** TEM images of ZIS nanoplates

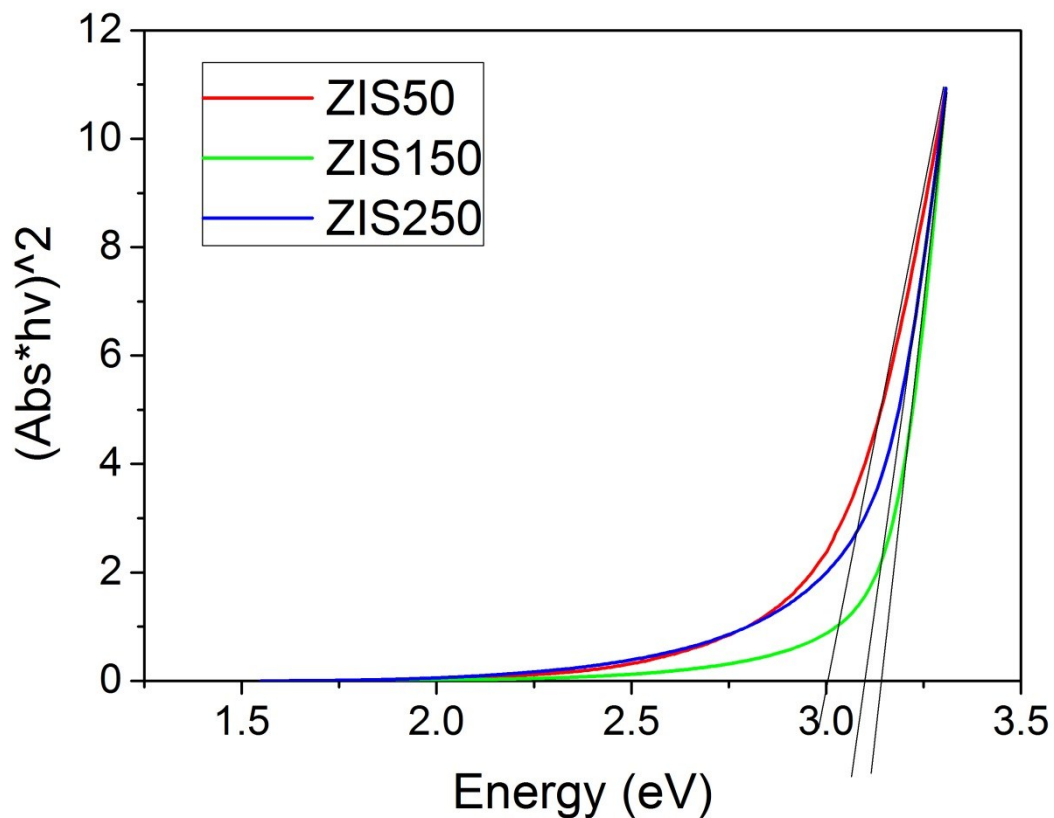

**Figure S2:** Tauc's plot of absorbance squared versus energy. The linear relationship signifies a direct band gap. The extrapolation to the energy axis give the bandgap. There is a significant contribution from below gap absorption likely resulting from defect states within the forbidden gap.

## ZIS0

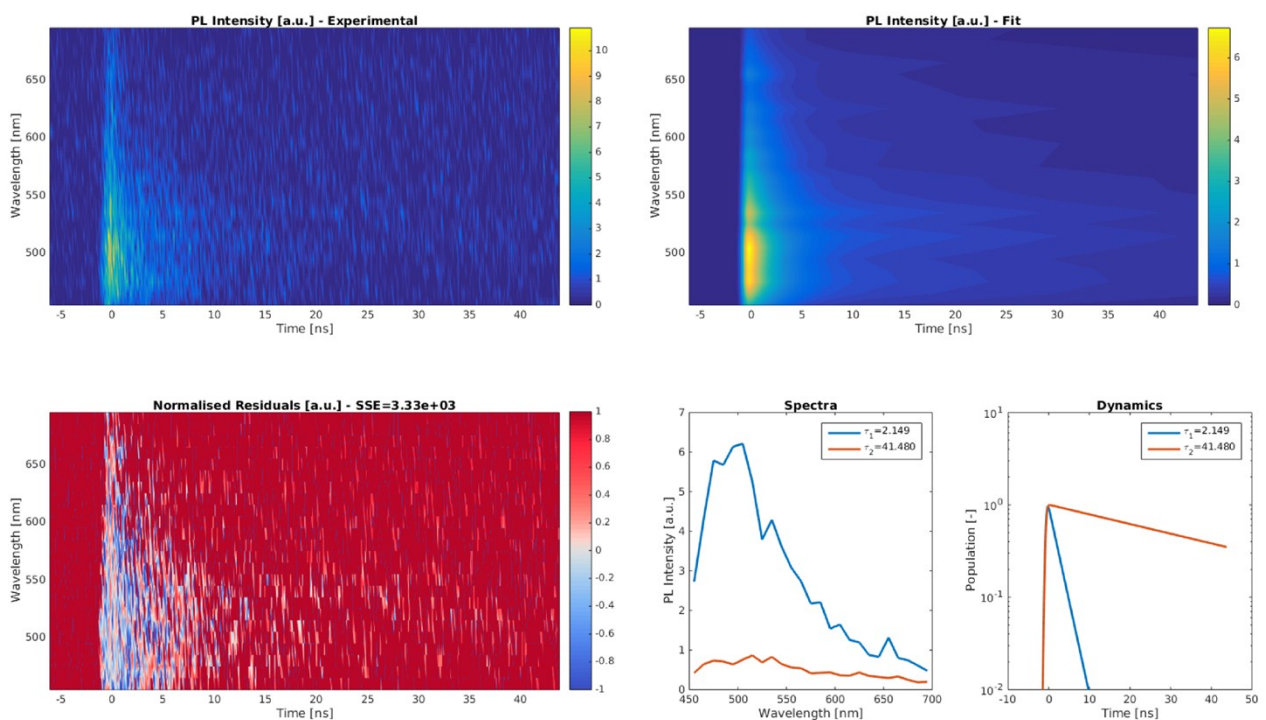

## ZIS50

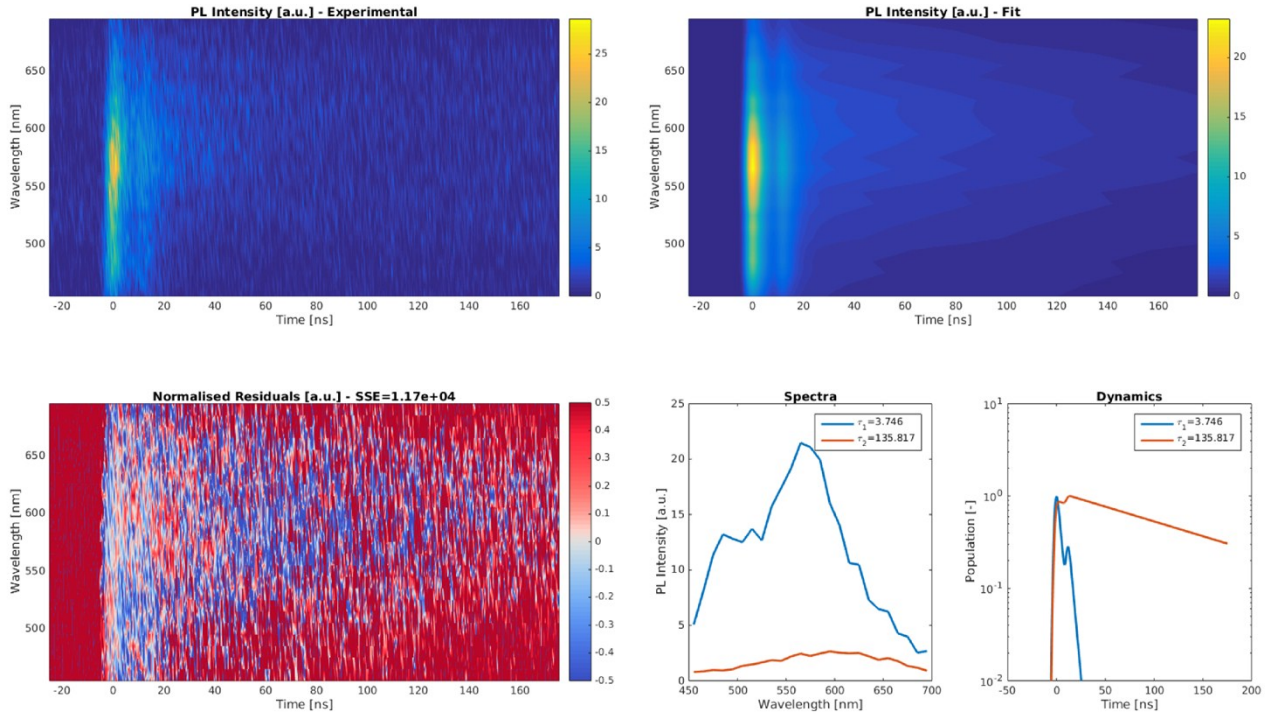

## ZIS150

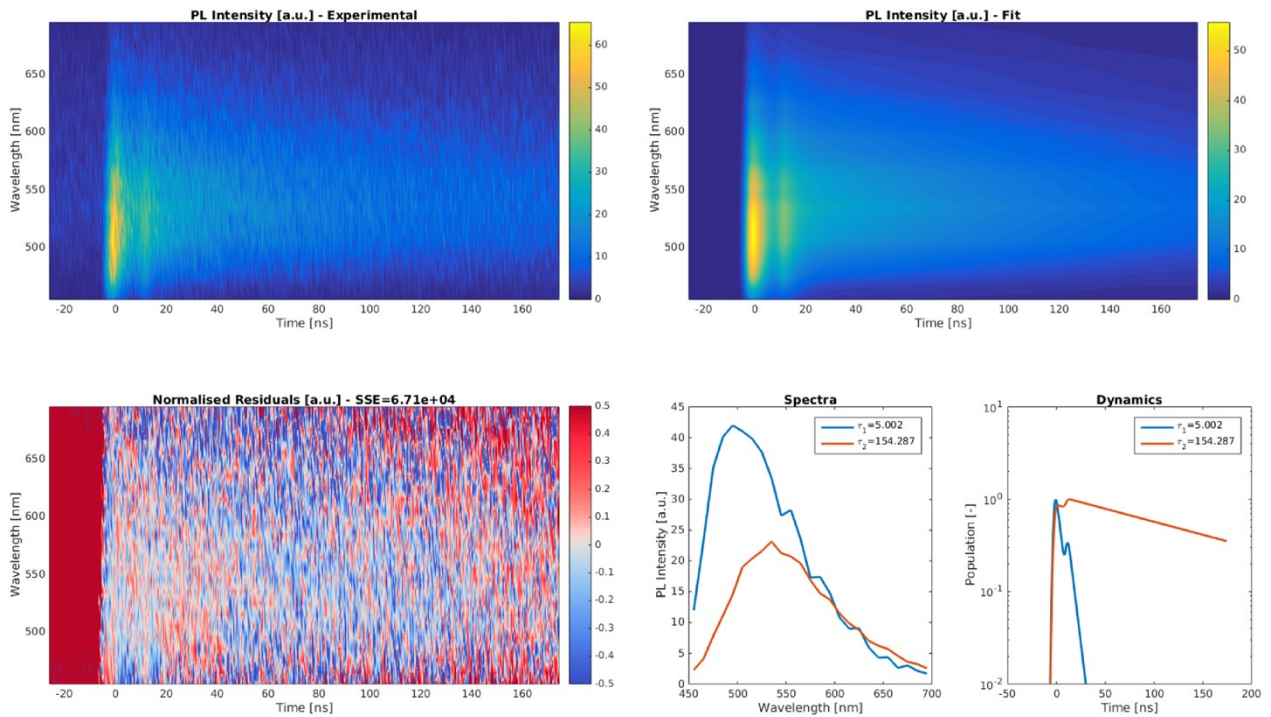

ZIS250

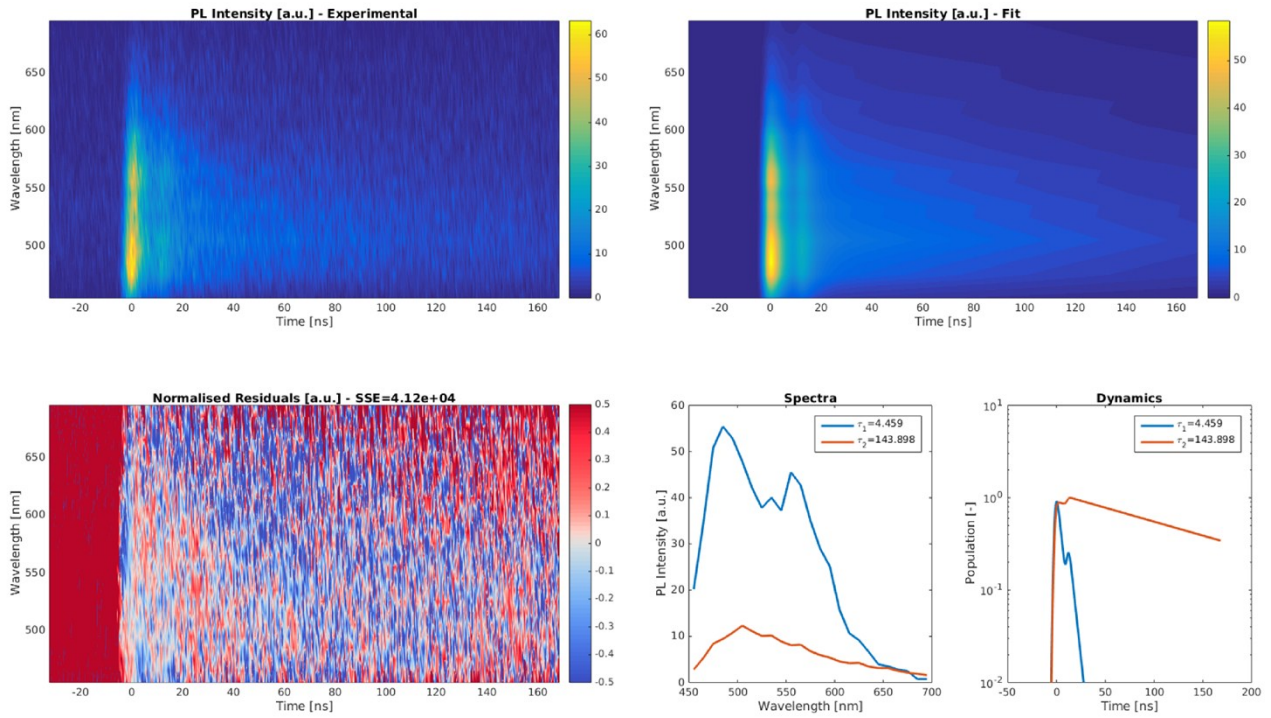

**Figure S3:** Global fits to TR PL data using EQ1 for samples ZIS0, ZIS50, ZIS150, and ZIS250. Residuals have been normalised to the experimental data as to more faithfully reflect inaccuracies. Dynamics were convolved with appropriate TR PL system temporal response functions. Some secondary excitations arising from leaked pulses in the acousto-optical modulator can be seen.

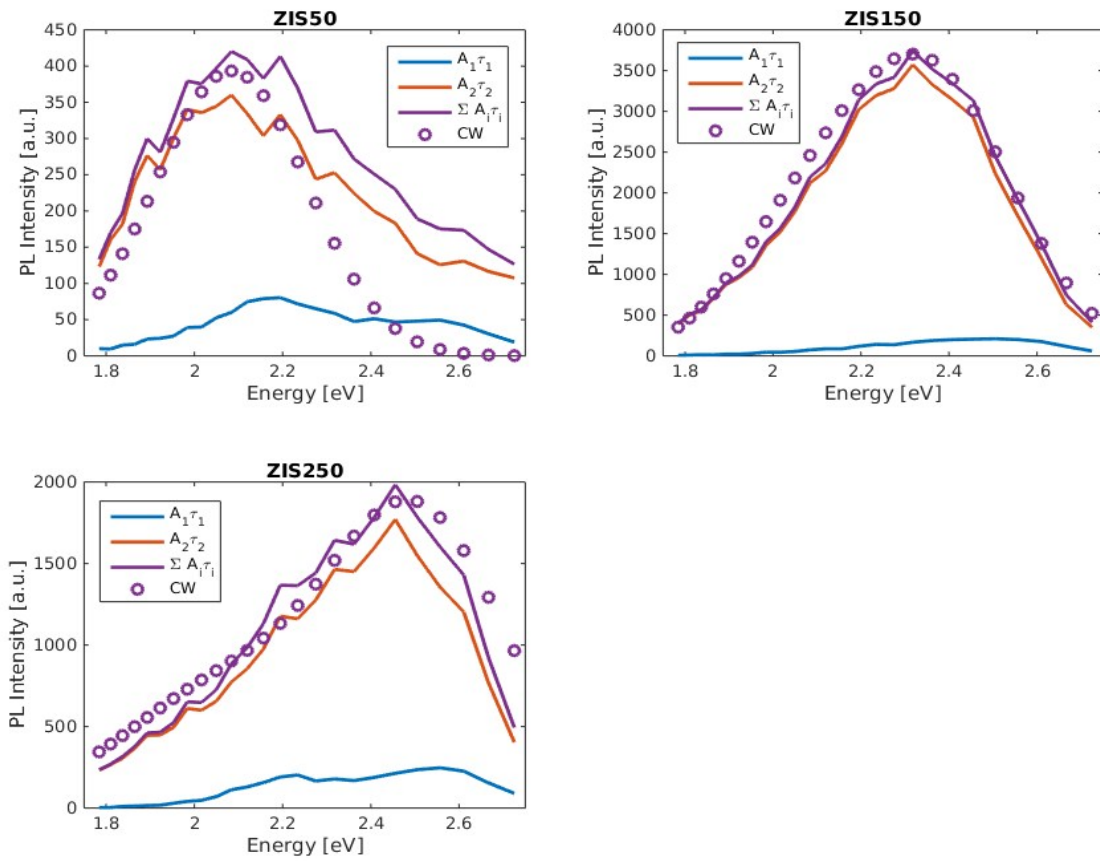

**Figure S4:** Temporal integrals of the TR PL global fit components. In each case, the time-integrated emission is dominated by long lifetime component ( $\tau_2$ ) despite its low relative amplitude. The CW experimental data are also plotted for comparison.
